# Supplementary material for: Enhanced upconversion luminescence of BiOCl:Yb3+,Er3+ nanosheets via carbon dot modification and their optical temperature sensing
Source: Royal Society of Chemistry journal article supplement (doi:10.1039/d0qm00589d), 2021-01-01
Supplement: d0qm00589d1.pdf [file d0qm00589d1.pdf]

## Electronic supplementary information

### **Enhanced upconversion luminescence of BiOCl:Yb<sup>3+</sup>,Er<sup>3+</sup> nanosheets via carbon dots modification and its optical temperature sensing**

Taizhong Xiao, Yongjin Li\*, Tianhui Wang, Youzhun Fan, Fangyu He, Qi Wang, Jin Han,

Zhaoyi Yin, Zhengwen Yang, Jianbei Qiu\*, Zhiguo Song\*

School of Materials Science and Engineering, Kunming University of Science and Technology,  
Kunming, 650093, China

\*Corresponding Author.

*E-mail addresses:* liyongjin@kust.edu.cn (Y. Li); qiu@kust.edu.cn (J. Qiu); songzg@kust.edu.cn  
(Z. Song)

## Experimental Section

### Chemicals and materials

$\text{C}_3\text{H}_6\text{N}_6$  (Aladdin, 99%),  $\text{Er}_2\text{O}_3$  (Aladdin, 99.99%),  $\text{Yb}_2\text{O}_3$  (Aladdin, 99.99%),  $\text{Bi}(\text{NO}_3)_3 \cdot 5\text{H}_2\text{O}$  (A. R., Shanghai, China), and  $\text{NaCl}$  (A. Tianjin, China) were used as starting materials.  $\text{Er}(\text{NO}_3)_3$  and  $\text{Yb}(\text{NO}_3)_3$  were prepared by dissolving the corresponding rare earth oxide in  $\text{HNO}_3$  under heating.

### Synthesis

All chemicals were used as purchased without any further purification. Melamine powder (10 g) was heated to 550 °C at a heating rate of 5 °C/min in a porcelain boat for 4 h. Then ground the reacted bulk sample into powder, a pale yellow bulk g- $\text{C}_3\text{N}_4$  solid powder was obtained.<sup>1</sup> Synthesis of CDs/BiOCl:  $\text{Yb}^{3+}$ ,  $\text{Er}^{3+}$  composite. The sample was synthesized through a typical hydrothermal and subsequent heat treatment method. The specific process is as follows: A certain amount of g- $\text{C}_3\text{N}_4$  were ultrasonical immersed in 30 mL deionized water for 24 h and defined as solution A. After that, stoichiometric amounts of  $\text{Yb}_2\text{O}_3$  (10.0 mol%) and  $\text{Er}_2\text{O}_3$  (1.0 mol%) were dissolved in an appropriate amount of concentrated nitric acid at 200 °C and 5 mmol  $\text{Bi}(\text{NO}_3)_3 \cdot 5\text{H}_2\text{O}/\text{NaCl}$  was added to 50 mL of deionized water with continuous stirring to obtain solution B. The solution B was dropwise added into solution A under stirring. After being stirred for 1h, the suspension was added into 100 mL Teflon-lined autoclave and subsequently heated at 160°C for 24 h. The reactor was then allowed to cool to room temperature naturally and the precipitate was collected and washed with deionized water and ethanol for six times, and the

final products dried at 60°C for 24 h. The added contents of g-C<sub>3</sub>N<sub>4</sub> in the g-C<sub>3</sub>N<sub>4</sub>/BiOCl materials were 2, 4, 6, and 8 wt %, respectively. As a comparison, a sample without g-C<sub>3</sub>N<sub>4</sub> was also prepared according to the above method. Subsequently, the prepared precursor was placed in a quartz crucible and heat-treated at 500°C for 2 hours in a muffle furnace with air atmosphere and thus the final phosphor was obtained. According to the compound amount of g-C<sub>3</sub>N<sub>4</sub>, the samples after heat treatment are named BYE, 2 CDs/BYE, 4 CDs/BYE, 6 CDs/BYE, 8 CDs/BYE, respectively.

### **Characterization**

The crystalline structures of the samples were characterized by powder X-ray diffraction (XRD) (Bruker D8 Advance diffractometer using Cu K $\alpha$  ( $\lambda$ = 1.5406 Å) radiation). The morphology of the obtained samples was investigated by using scanning electron microscopy (SEM, Hitachi SU-8010) with an acceleration voltage of 25 kV accompanied with energy dispersive spectroscopy (EDS) to examine the chemical composition. Transmission electron microscopy (TEM) and high resolution transmission electron microscopy (HRTEM) of the samples were conducted using a TecnaiG2 TF30 electron microscope. The UV-Vis-NIR absorption spectra of the samples were obtained using a Hitachi UV-4100 spectrophotometer. The X-ray Photoelectron Spectroscopy spectrum (XPS) (Thermo Fisher Scientific, US) was carried out to analyze the surface elemental composition analyses. The FT-IR spectra were obtained using a German Bruker ALPHA infrared spectrometer. The UC luminescence spectra and lifetimes were recorded using an Edinburgh Instruments

FLS980 spectrofluorometric equipped with both continuous and pulsed xenon lamps and a 980 nm laser diode (LD) as excitation sources. The samples were placed inside a temperature-regulated chamber purged with N<sub>2</sub> gas (Linkam DSC 600 stage system) for obtaining the temperature-dependent spectra. The temperature of the chamber was varied from 293 to 573 K.

The photocurrents were measured using an electrochemical workstation (Bio-Logic SP-300) with a standard three-electrode system with a Pt wire as the counter electrode, saturated Hg/Hg<sub>2</sub>Cl<sub>2</sub> (in saturated KCl) as the reference electrode, and Na<sub>2</sub>SO<sub>4</sub> (0.5 M) aqueous solution as the electrolyte. Xenon lamp (power 300W) loaded with 420 nm filter as visible light source and a 980 nm laser diode was utilized as the light source. The transient photocurrent responses with time (I–t curve) of the working electrodes were measured at a bias potential of 1.5 V during repeated on/off illumination cycles under continuous irradiation.

## Results Section

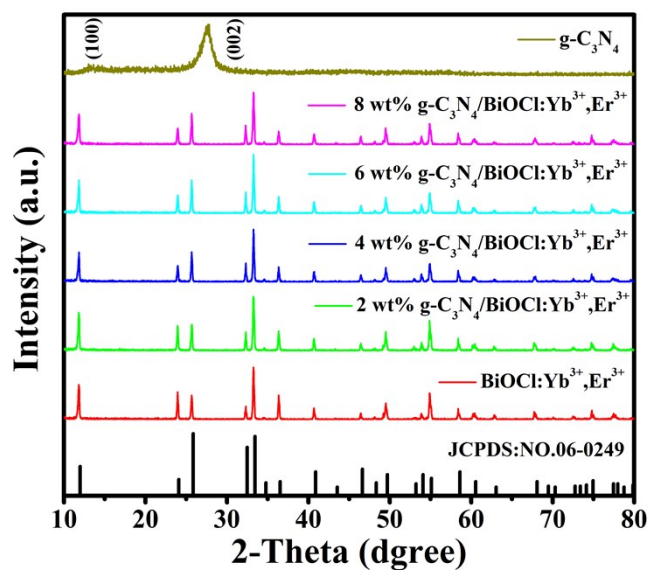

Figure S1. XRD of pure  $\text{g-C}_3\text{N}_4$ ,  $\text{BiOCl:Yb}^{3+}$ ,  $\text{Er}^{3+}$  and  $\text{BiOCl:Yb}^{3+}$ ,  $\text{Er}^{3+}$  samples with different weight percentage of  $\text{g-C}_3\text{N}_4$  in the composites before annealing.

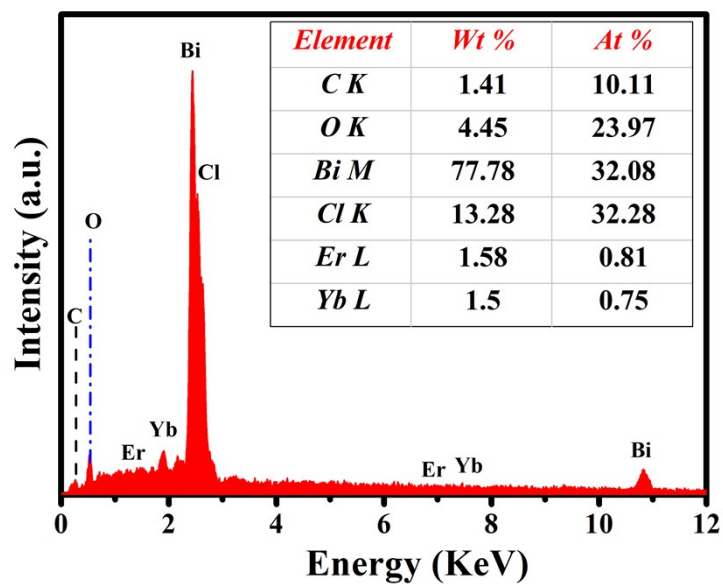

Figure S2. EDS spectrum of the 6CDs/BYE sample.

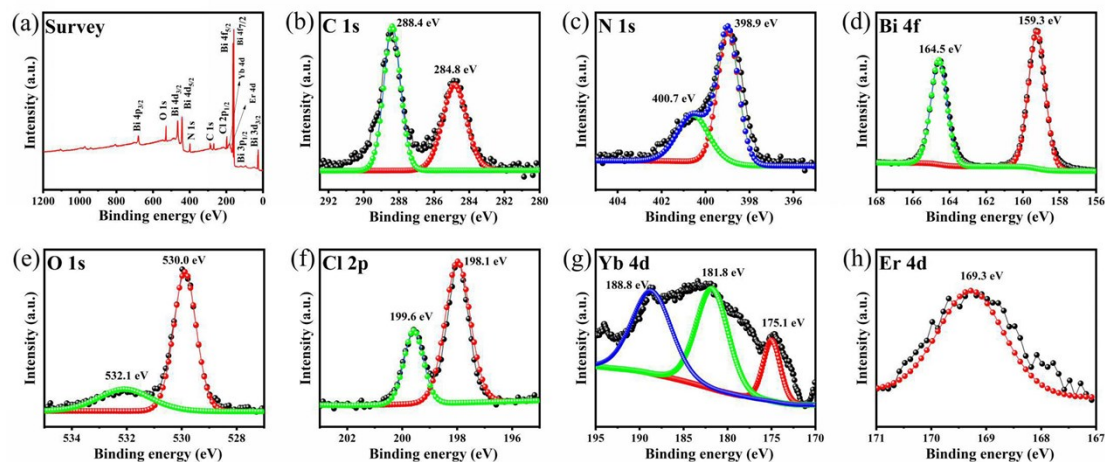

Figure S3. X-ray photoelectron spectroscopy (XPS) spectra of the 6CDs/BYE composite before heat treatment: (a) Survey, (b) C 1s, (c) N 1s, (d) Bi 4f, (e) O 1s, (f) Cl 2p, (g) Yb 4d, (h) Er 4d.

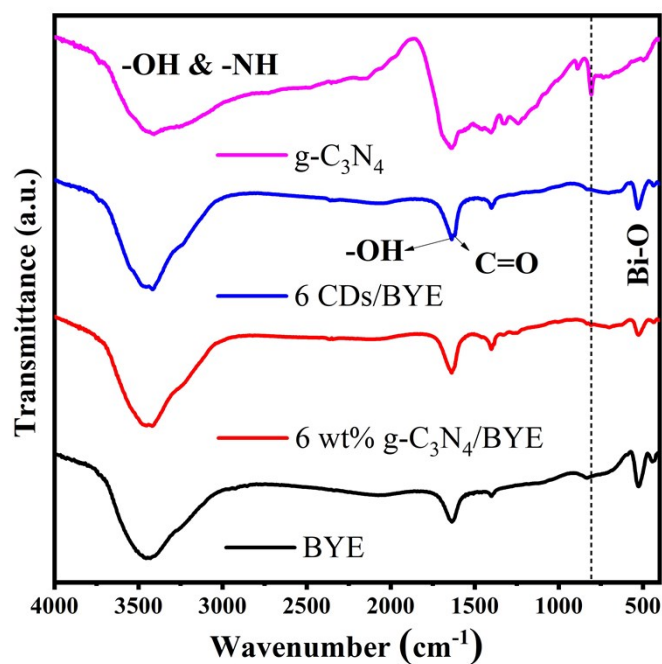

Figure S4. FT-IR spectra for the BYE, 6wt%  $\text{g-C}_3\text{N}_4/\text{BYE}$ , 6CDs/BYE,  $\text{g-C}_3\text{N}_4$  samples.

In terms of g-C<sub>3</sub>N<sub>4</sub>, the broad peaks between 3000 and 3400 cm<sup>-1</sup> correspond to the stretching vibrational modes of N-H and O-H groups, respectively, which are associated with uncondensed amino groups and surface adsorbed H<sub>2</sub>O molecules.<sup>2</sup> In addition, the characteristic vibration of thiazine rings at 806 cm<sup>-1</sup> is also observed.<sup>2</sup> The characteristic peak of BiOCl is observed at 528 cm<sup>-1</sup>, which refers to the stretching vibration of Bi-O bond.<sup>1</sup> As for the g-C<sub>3</sub>N<sub>4</sub>/BYE hybrids, the peaks of g-C<sub>3</sub>N<sub>4</sub> and BiOCl co-exist in the as-prepared g-C<sub>3</sub>N<sub>4</sub>/BYE nanocomposite and no other new phases are observed, manifesting that the g-C<sub>3</sub>N<sub>4</sub>/BYE composite nanosheets are successfully synthesized. After heat treatment, it is worth noting that the characteristic vibration peak of g-C<sub>3</sub>N<sub>4</sub> disappeared, and the C=O bond vibration peak appeared at 1620 cm<sup>-1</sup>.<sup>3</sup>

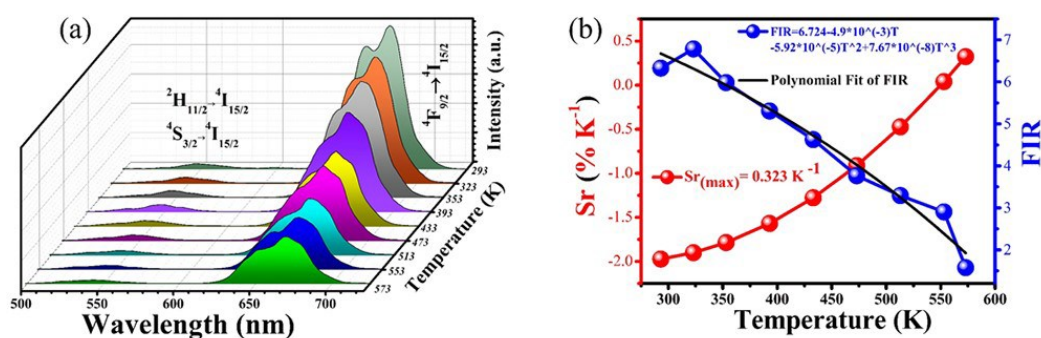

Figure S5. (a) Temperature-dependent photoluminescence spectra of the 6CDs/BYE nanosheets. (b) the temperature-dependent luminescent behaviors of  $I_{\text{red}}/I_{\text{green}}$  as a function of temperature and relative sensitivities of  $S_r$ , respectively, with the excitation wavelength at 980 nm.

Compared with TCLs, the NTCLs have a variety of horizontal combinations for

the temperature sensing, which may be an effective method to obtain higher sensitivity. Greater flexibility in practical applications such as temperature range selection, excitation mode (wavelength/power), and detection method (UV-vis-NIR)<sup>4</sup>. Therefore, we investigated the temperature dependence of the red and green light energy levels of Er<sup>3+</sup> ions under 980 nm excitation as shown in Fig. S5(a). Due to the traditional FIR (Eq. (4)) is not suitable for the NTCL, the experimental FIR can be fitted by polynomial function:

$$FIR = \frac{I_{red}}{I_{green}} = C_1 + B_1T + B_2T^2 + B_3T^3 \quad (1)$$

where  $I_{red}$  and  $I_{green}$  are the integrated intensities of the red and green light levels, respectively,  $C_1$ ,  $B_1$ ,  $B_2$ , and  $B_3$  are adjustable constants,  $T$  is the absolute temperature.

Thence, the relative sensitivity can be described as:

$$S_r = \frac{1}{FIR} \frac{dFIR}{dT} = \frac{1}{FIR} (B_1 + 2B_2T + 3B_3T^2) \quad (2)$$

The evolutions of FIR and  $S_r$  values as a function of temperature are shown in Fig.S4(b). The maximum sensitivity of this optical thermometer is determined to be 0.32% K<sup>-1</sup> at 573 K based on <sup>4</sup>F<sub>9/2</sub>(red emission) and <sup>2</sup>H<sub>11/2</sub>, <sup>4</sup>S<sub>3/2</sub>(green emission) levels. Therefore, the present phosphor can be used as an excellent material for optical thermometer with high sensitivity.

## References

1. Y. Chen, F. Wang, Y. Cao, F. Zhang, Y. Zou, Z. Huang, L. Ye, Y. Zhou, Interfacial Oxygen Vacancy Engineered Two-Dimensional g-C<sub>3</sub>N<sub>4</sub>/BiOCl Heterostructures with Boosted Photocatalytic Conversion of CO<sub>2</sub>, *ACS Appl. Energy Mater.*, 2020, **3**, 4610-4618.
2. S. Asadzadeh-Khaneghah, A. Habibi-Yangjeh, K. Yubuta, Novel g-C<sub>3</sub>N<sub>4</sub> nanosheets/CDs/BiOCl photocatalysts with exceptional activity under visible light, *J. Am. Ceram. Soc.*, 2019, **102**, 1435-1453.
3. X. Xu, X. Zhang, C. Hu, Y. Zheng, B. Lei, Y. Liu, J. Zhuang, Construction of NaYF<sub>4</sub>:Yb,Er(Tm)@CDs composites for enhancing red and NIR upconversion emission, *J. Mater. Chem. C*, 2019, **7**, 6231-6235.
4. Z. Wang, H. Jiao, Z. Fu, Investigation on the up-conversion luminescence and temperature sensing properties based on non-thermally coupled levels of rare earth ions doped Ba<sub>2</sub>In<sub>2</sub>O<sub>5</sub> phosphor, *J. Lumin.*, 2019, **206**, 273-277.
